# Supplementary material for: Extensive variation and low heritability of DNA methylation identified in a twin study
Source: HighWire-hosted journal article supplement (doi:10.1101/gr.119685.110), 2011-09-26
Supplement: Supp_Fig_Legends.pdf [file Supp_Fig_Legends.pdf]

**Supplemental Figure S1** Histograms showing the replicate-to-replicate variances in each position in three cultures derived from one sample.

**Supplemental Figure S2** Empirical cumulative distribution functions for DNA methylation values and variance. The distribution of methylation values are significantly different for the four region types (Supplemental Table S3), whereas the variance is very similar for each of the region type
